# Supplementary material
Source: PubMed Central journal article supplement (PMC3392622)
Supplement: Supp_Data.pdf [file Supp_Data.pdf]

## Supplementary Data

Kir6.2 primers:

sense 5' - TAG GCC AAG CCA GTG TAG TG -3';

antisense 5' - GTG GTG AAC ACA TCC TGC AG -3';

UCP2 primers:

sense 5' - GAC TGC CTT GGG AAA AGC GCC T -3';

antisense 5' - CTC AGA AAG GTG CCT CCC GA -3'.

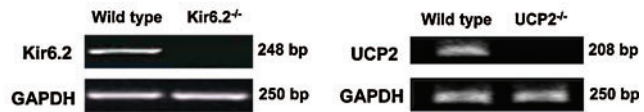

**SUPPLEMENTARY FIG. S1.** The expressions of Kir6.2 and UCP2 in the midbrain of wildtype, *Kir6.2*<sup>-/-</sup> and *Ucp2*<sup>-/-</sup> mice.
